# Supplementary material for: Vibrational circular dichroism studies of exceptionally strong chirality inducers in liquid crystals
Source: Royal Society of Chemistry journal article supplement (doi:10.1039/d1cp00854d), 2021-01-01
Supplement: d1cp00854d1.pdf [file d1cp00854d1.pdf]

## Supporting Information

# Vibrational circular dichroism studies of exceptionally strong chirality inducers in liquid crystals

Mark A.J. Koenis<sup>a</sup>, Valentin P. Nicu<sup>b</sup>, Lucas Visscher<sup>c</sup>, Christian Kuehn<sup>d</sup>,  
Matthias Bremer<sup>d</sup>, Mireille Krier<sup>e</sup>, Harald Untenecker<sup>e</sup>, Ulmas Zhumaev<sup>e</sup>,  
Bernd Küstner<sup>e</sup>, Wybren Jan Buma<sup>\*a,f</sup>

<sup>a</sup>Van 't Hoff Institute for Molecular Sciences, University of Amsterdam, Science Park 904,  
1098 XH Amsterdam, The Netherlands

<sup>b</sup>Faculty of Agricultural Sciences, Food Industry and Environmental Protection, Lucian Blaga  
University of Sibiu, Ioan Ratiu Street, 550012 Sibiu, Romania

<sup>c</sup>Amsterdam Center for Multiscale Modeling, Section Theoretical Chemistry, Faculty of  
Sciences, Vrije Universiteit Amsterdam, De Boelelaan 1083, 1081 HV Amsterdam, The  
Netherlands

<sup>d</sup>Performance Materials, Liquid Crystals R&D, Merck KGaA, Frankfurter Str. 250, 64293  
Darmstadt, Germany

<sup>e</sup>Site Management, Central Analytics Department, Merck KGaA, Frankfurter Str. 250, 64293  
Darmstadt, Germany

<sup>f</sup>Radboud University, Institute for Molecules and Materials, FELIX Laboratory, Toernooiveld  
7c, 6525 ED Nijmegen, The Netherlands.

---

\*w.j.buma@uva.nl

| NM  | $\tau$      | Freq.         | $R_{01}$      | $R_{01}^{\text{GCO}}$ | $ \vec{E}_{01}^{\text{A}} $ | $ \vec{E}_{01}^{\text{B}} $ | $ \vec{E}_{01}^{\text{A}} \times \vec{E}_{01}^{\text{B}} $ | $\xi$        |
|-----|-------------|---------------|---------------|-----------------------|-----------------------------|-----------------------------|------------------------------------------------------------|--------------|
| 201 | 47.2        | 1069.2        | 329.0         | 229.6                 | 10.6                        | 13.9                        | 86.55                                                      | 35.9         |
| 201 | 57.0        | 1069.9        | 302.3         | 212.1                 | 10.7                        | 14.2                        | 83.64                                                      | 33.4         |
| 201 | <b>68.5</b> | <b>1070.5</b> | <b>280.7</b>  | <b>192.1</b>          | <b>10.8</b>                 | <b>14.2</b>                 | <b>78.94</b>                                               | <b>31.0</b>  |
| 201 | 78.5        | 1070.4        | 259.8         | 176.7                 | 10.9                        | 14.3                        | 76.91                                                      | 29.6         |
| 201 | 88.5        | 1070.0        | 246.6         | 164.1                 | 11.0                        | 14.4                        | 75.47                                                      | 28.5         |
| 209 | 47.2        | 1117.6        | -67.9         | -64.2                 | 4.8                         | 5.6                         | 27.06                                                      | 98.3         |
| 209 | 57.0        | 1118.5        | -66.1         | -61.8                 | 4.7                         | 5.8                         | 26.88                                                      | 101.5        |
| 209 | <b>68.5</b> | <b>1119.2</b> | <b>-65.7</b>  | <b>-61.6</b>          | <b>4.8</b>                  | <b>6.0</b>                  | <b>27.42</b>                                               | <b>104.7</b> |
| 209 | 78.5        | 1119.5        | -65.5         | -61.6                 | 4.9                         | 6.2                         | 28.87                                                      | 107.5        |
| 209 | 88.5        | 1120.0        | -67.2         | -64.7                 | 5.2                         | 6.6                         | 31.77                                                      | 110.9        |
| 223 | 47.2        | 1187.6        | -396.6        | -365.7                | 11.8                        | 20.7                        | 205.27                                                     | 122.9        |
| 223 | 57.0        | 1188.8        | -403.5        | -362.8                | 11.7                        | 21.9                        | 211.02                                                     | 124.6        |
| 223 | <b>68.5</b> | <b>1189.9</b> | <b>-383.7</b> | <b>-331.6</b>         | <b>11.0</b>                 | <b>22.5</b>                 | <b>199.83</b>                                              | <b>126.6</b> |
| 223 | 78.5        | 1189.7        | -377.2        | -321.3                | 11.1                        | 23.0                        | 195.76                                                     | 129.7        |
| 223 | 88.5        | 1189.2        | -373.5        | -312.9                | 11.3                        | 23.1                        | 191.87                                                     | 132.4        |
| 223 | 47.2        | 1187.6        | -396.6        | -365.7                | 11.8                        | 20.7                        | 205.27                                                     | 122.9        |
| 223 | 57.0        | 1188.8        | -403.5        | -362.8                | 11.7                        | 21.9                        | 211.02                                                     | 124.6        |
| 223 | <b>68.5</b> | <b>1189.9</b> | <b>-383.7</b> | <b>-331.6</b>         | <b>11.0</b>                 | <b>22.5</b>                 | <b>199.83</b>                                              | <b>126.6</b> |
| 223 | 78.5        | 1189.7        | -377.2        | -321.3                | 11.1                        | 23.0                        | 195.76                                                     | 129.7        |
| 223 | 88.5        | 1189.2        | -373.5        | -312.9                | 11.3                        | 23.1                        | 191.87                                                     | 132.4        |
| 241 | 47.2        | 1246.1        | 266.3         | 214.5                 | 9.1                         | 9.0                         | 59.41                                                      | 46.7         |
| 241 | 57.0        | 1246.3        | 300.6         | 247.5                 | 10.4                        | 9.7                         | 70.06                                                      | 44.0         |
| 241 | <b>68.5</b> | <b>1246.5</b> | <b>324.4</b>  | <b>266.7</b>          | <b>11.5</b>                 | <b>9.9</b>                  | <b>75.66</b>                                               | <b>41.5</b>  |
| 241 | 78.5        | 1246.3        | 295.6         | 233.3                 | 11.5                        | 8.8                         | 62.59                                                      | 38.2         |
| 241 | 88.5        | 1246.1        | 219.2         | 164.0                 | 10.1                        | 6.9                         | 40.33                                                      | 35.6         |
| 266 | 47.2        | 1314.8        | 128.3         | 86.0                  | 5.6                         | 5.0                         | 15.56                                                      | 33.7         |
| 266 | 57.0        | 1314.5        | 127.9         | 88.8                  | 6.0                         | 5.4                         | 17.52                                                      | 32.7         |
| 266 | <b>68.5</b> | <b>1314.2</b> | <b>129.6</b>  | <b>63.3</b>           | <b>6.7</b>                  | <b>5.9</b>                  | <b>21.37</b>                                               | <b>32.8</b>  |
| 266 | 78.5        | 1313.2        | 127.2         | 68.6                  | 7.1                         | 6.5                         | 25.22                                                      | 32.7         |
| 266 | 88.5        | 1311.7        | 125.3         | 75.3                  | 7.6                         | 7.3                         | 30.64                                                      | 33.5         |
| 327 | 47.2        | 1487.4        | 563.0         | 538.3                 | 12.7                        | 12.0                        | 142.18                                                     | 69.4         |
| 327 | 57.0        | 1487.5        | 546.8         | 527.0                 | 13.1                        | 11.8                        | 139.64                                                     | 64.3         |
| 327 | <b>68.5</b> | <b>1487.5</b> | <b>538.9</b>  | <b>529.2</b>          | <b>12.8</b>                 | <b>12.4</b>                 | <b>139.52</b>                                              | <b>61.2</b>  |
| 327 | 78.5        | 1487.3        | 512.1         | 508.4                 | 12.1                        | 13.2                        | 135.08                                                     | 58.0         |
| 327 | 88.5        | 1487.2        | 486.9         | 489.1                 | 11.7                        | 13.4                        | 130.40                                                     | 56.2         |
| 328 | 47.2        | 1488.3        | -473.0        | -499.3                | 11.6                        | 12.1                        | 132.87                                                     | 109.1        |
| 328 | 57.0        | 1488.8        | -460.9        | -482.9                | 11.2                        | 12.5                        | 128.18                                                     | 114.2        |
| 328 | <b>68.5</b> | <b>1489.3</b> | <b>-456.8</b> | <b>-478.2</b>         | <b>11.6</b>                 | <b>12.2</b>                 | <b>125.89</b>                                              | <b>117.3</b> |
| 328 | 78.5        | 1489.6        | -443.8        | -461.3                | 12.3                        | 11.5                        | 121.56                                                     | 120.7        |
| 328 | 88.5        | 1489.9        | -436.8        | -449.6                | 12.5                        | 11.3                        | 118.34                                                     | 122.8        |
| 335 | 47.2        | 1579.0        | 139.8         | 131.3                 | 9.4                         | 6.5                         | 51.47                                                      | 56.9         |
| 335 | 57.0        | 1578.8        | 133.1         | 127.2                 | 9.8                         | 6.5                         | 52.09                                                      | 54.4         |
| 335 | <b>68.5</b> | <b>1578.3</b> | <b>133.7</b>  | <b>130.7</b>          | <b>9.7</b>                  | <b>7.2</b>                  | <b>55.14</b>                                               | <b>51.5</b>  |
| 335 | 78.5        | 1578.1        | 130.1         | 128.1                 | 9.4                         | 7.8                         | 54.98                                                      | 48.1         |
| 335 | 88.5        | 1577.9        | 124.2         | 123.8                 | 9.5                         | 7.9                         | 53.22                                                      | 45.4         |
| 336 | 47.2        | 1581.3        | -86.0         | -107.8                | 5.4                         | 8.7                         | 37.88                                                      | 125.9        |
| 336 | 57.0        | 1582.1        | -83.6         | -103.7                | 5.3                         | 9.0                         | 37.40                                                      | 128.0        |
| 336 | <b>68.5</b> | <b>1582.0</b> | <b>-90.6</b>  | <b>-108.7</b>         | <b>6.0</b>                  | <b>8.9</b>                  | <b>40.58</b>                                               | <b>130.4</b> |
| 336 | 78.5        | 1582.0        | -95.1         | -111.8                | 6.6                         | 8.8                         | 42.04                                                      | 133.4        |
| 336 | 88.5        | 1581.8        | -98.6         | -113.5                | 6.7                         | 9.1                         | 42.70                                                      | 136.1        |

Table S1: GCO analysis of the signature GCO-VCD bands in the linear transit structures using the GCO fragments defined in Figure 1a. Frequencies are given in  $\text{cm}^{-1}$ ;  $R_{01}$  and  $R_{01}^{\text{GCO}}$  in  $10^{-44} \text{esu}^2 \cdot \text{cm}^2$ ;  $|\vec{E}_{01}^{\text{A}}|$  and  $|\vec{E}_{01}^{\text{B}}|$  in  $10^{-20} \text{esu}^2 \cdot \text{cm}^2$ ;  $|\vec{E}_{01}^{\text{A}} \times \vec{E}_{01}^{\text{B}}|$  in  $10^{-40} \text{esu}^2 \cdot \text{cm}^2$ ; and  $\tau$  and  $\xi$  in degrees.
